# Supplementary material for: Loss of GRLF1 induces aneuploidy and enhances bladder cancer cell migration and invasion by modulating actin dynamics
Source: Research Square preprint supplement (doi:10.21203/rs.3.rs-6362761/v1), 2025-05-07
Supplement: Supplementary file 1 [file 0326d427efb9d43708ea8ce2.pdf]

## Supplementary Figure

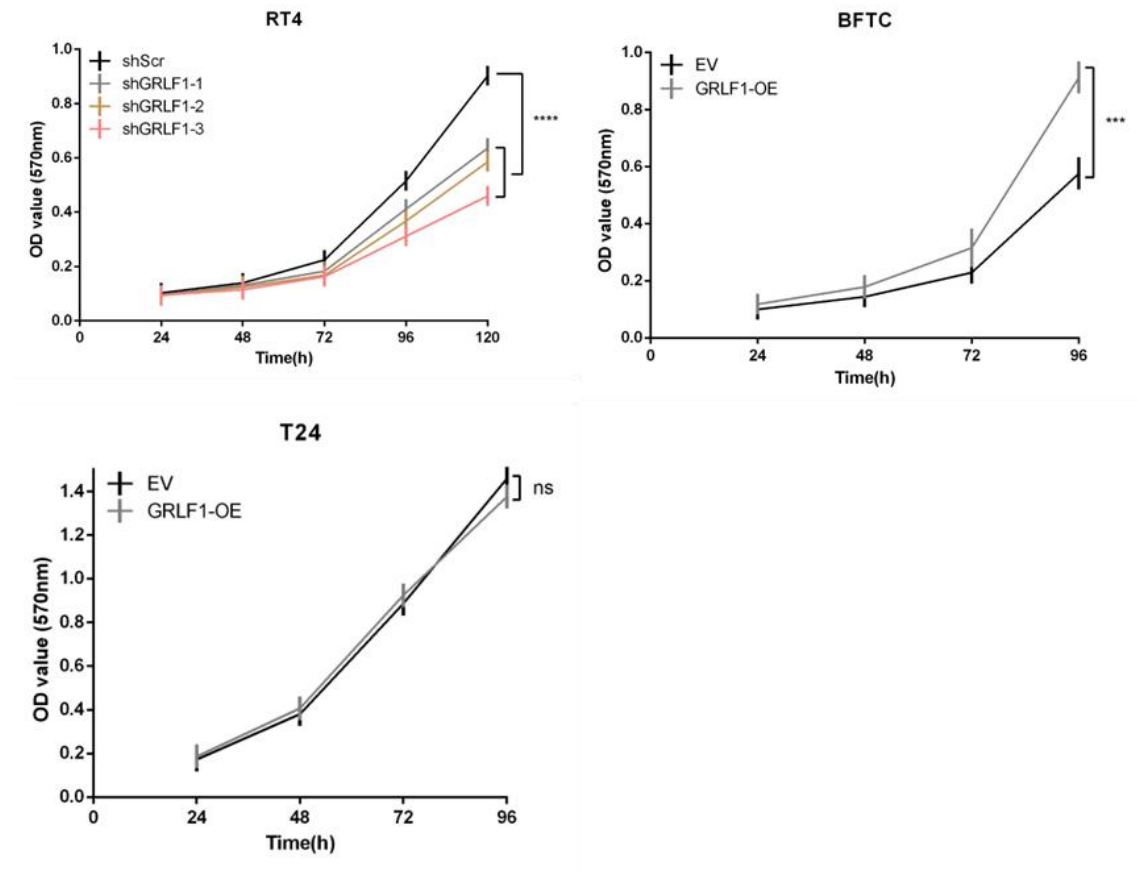

**Figure S1. GRLF1 influences cell proliferation of bladder cancer in MTT assay.**

Cell proliferation is decreased in RT4 cells with GRLF1 knockdown compared to scramble control (shScr) and increased in BFTC cells with GRLF1 overexpression (OE) compared to empty control (EV). Cell proliferation in T24 EV and GRLF1 OE cells shows no significant difference. Data are presented as mean  $\pm$  SD (n=3, ns:  $P > 0.05$ , \*\*\*  $p < 0.001$ , \*\*\*\*  $p < 0.0001$ , Two-Way ANOVA).

## **Method**

### ***MTT assay***

Cell viability was quantified using an MTT assay. Cells were digested and transferred into 15 ml sterile tubes. Count cell number three times and dilute 100,000 cells in 10 ml of culture medium. Mix the cell suspension thoroughly and seed the cells 100  $\mu$ l per well into a 96-well plate with 6 replicates. The cells were repeatedly seeded in 5 plates, and cell viability was detected at 24, 48, 72, 96, and 120-hour time points. Add 20  $\mu$ l of 5 mg/ml MTT solution to each well for detection. One set of wells was included with MTT but without cells (control). Incubate the plate at 37°C for 4 hours. After that, aspirate the medium carefully and add 100  $\mu$ l MTT lysis buffer into each well. Wrap the plate in foil and shake on an orbital shaker for 10 minutes. The absorption of samples was measured at 590 nm wavelength in a Spectrophotometer.
